# Supplementary material
Source: PubMed Central journal article supplement (PMC3127887)
Supplement: 1107297108_pnas.201107297SI.pdf [file 1107297108_pnas.201107297SI.pdf]

# Supporting Information

Haegens et al. 10.1073/pnas.1107297108

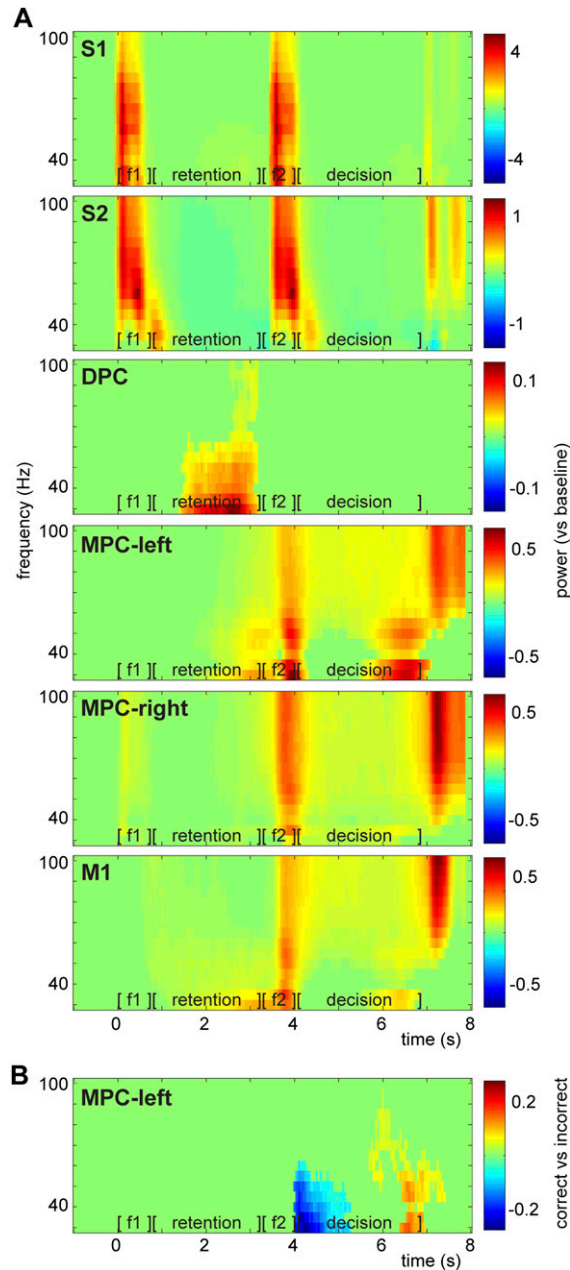

**Fig. S1.** Gamma band activity in the LFPs during the somatosensory discrimination task. (A) Time-frequency representations showing oscillatory activity in the gamma band (40–100 Hz) related to different aspects of the discrimination task. Conventions are the same as in Fig. 2. Note significant focal gamma band increase in the retention delay in DPC and in decision delay in MPC-left. (B) Similar for correct vs. incorrect trials. Only in MPC-left significant modulation of delay activity in the gamma band was observed.
